# Supplementary material for: Cube-like CuCoO nanostructures on reduced graphene oxide for H2 generation from ammonia borane
Source: Royal Society of Chemistry journal article supplement (doi:10.1039/c8qi00183a), 2018-01-01
Supplement: c8qi00183a1.pdf [file c8qi00183a1.pdf]

## Supporting information

### **Cube-Like CuCoO Nanostructures on Reduced Graphene Oxide for H<sub>2</sub> Generation from Ammonia Borane**

*Hechuang Zheng, Kun Feng, Yunpeng Shang, Zhenhui Kang \*, Xuhui Sun, and Jun*

*Zhong\**

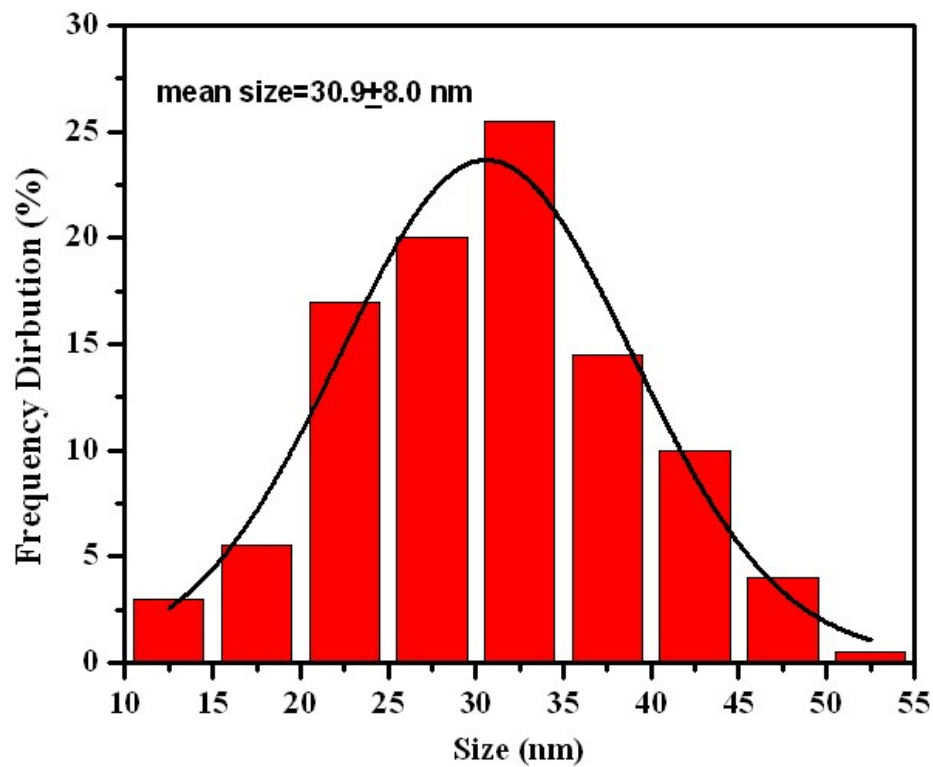

**Figure S1:** The particle size distribution of  $\text{Cu}_{0.5}\text{Co}_{0.5}\text{O}$ -rGO with an average size of 30.9 nm.

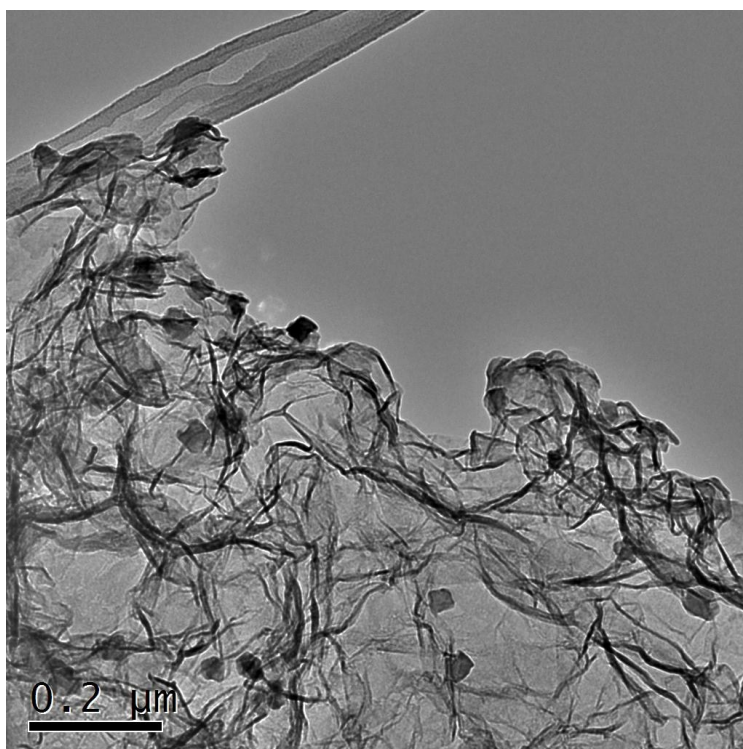

**Figure S2:** TEM image of the  $\text{Cu}_{0.5}\text{Co}_{0.5}\text{O}$ -rGO sample.

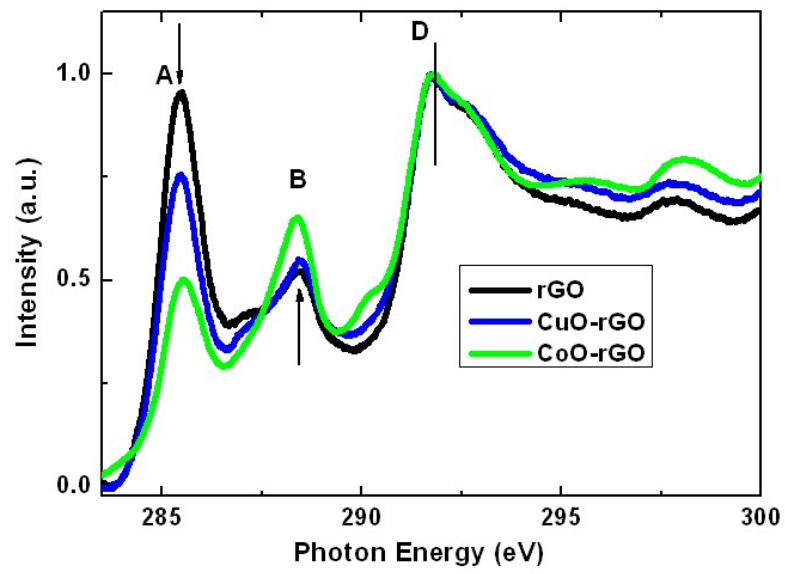

**Figure S3:** XAS spectra of rGO, CuO-rGO and CoO-rGO samples at C K-edge.

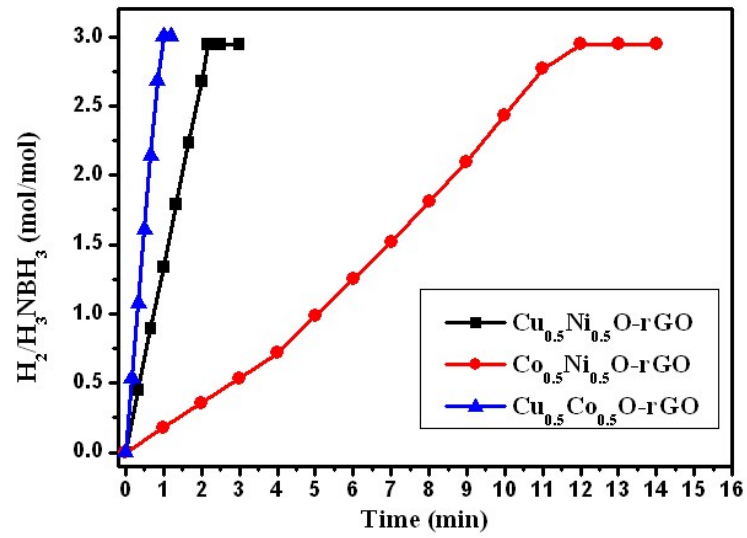

**Figure S4:** Hydrogen evolution curves of the hydrolysis of AB aqueous solution catalyzed by  $\text{Cu}_{0.5}\text{Co}_{0.5}\text{O-rGO}$ ,  $\text{Cu}_{0.5}\text{Ni}_{0.5}\text{O-rGO}$  and  $\text{Co}_{0.5}\text{Ni}_{0.5}\text{O-rGO}$  samples.

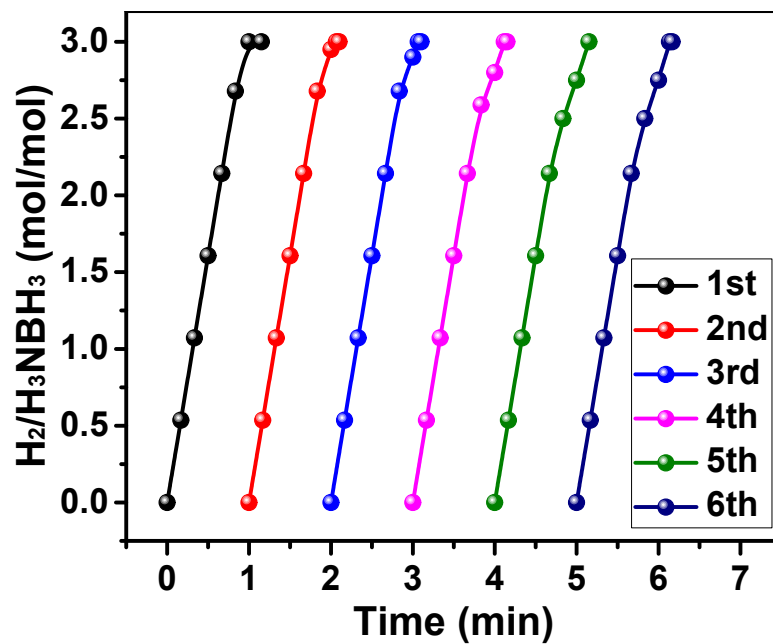

**Figure S5:** Stability test of  $Cu_{0.5}Co_{0.5}O$ -rGO in 6 runs for the hydrolysis of AB. The TOF value decreases from 81.7 to 72.1 (the 6<sup>th</sup> cycle, 88.3% left).

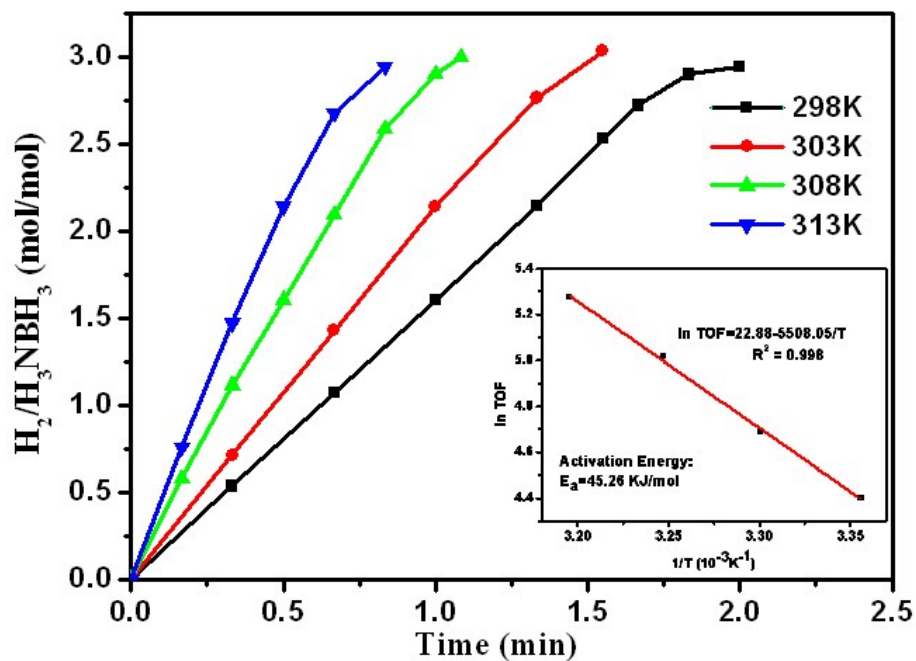

**Figure S6:** Hydrogen-generating rate as a function of temperature in the hydrolysis of AB catalyzed by  $\text{Cu}_{0.5}\text{Co}_{0.5}\text{O-rGO}$ . Since at a high temperature the reaction will be finished very quickly, we have used less  $\text{Cu}_{0.5}\text{Co}_{0.5}\text{O-rGO}$  (2.6 mg) in this reaction. Inset: Arrhenius plot of  $\ln(\text{TOF})$  versus  $1/T$ . The activation energy is 45.26 kJ/mol.

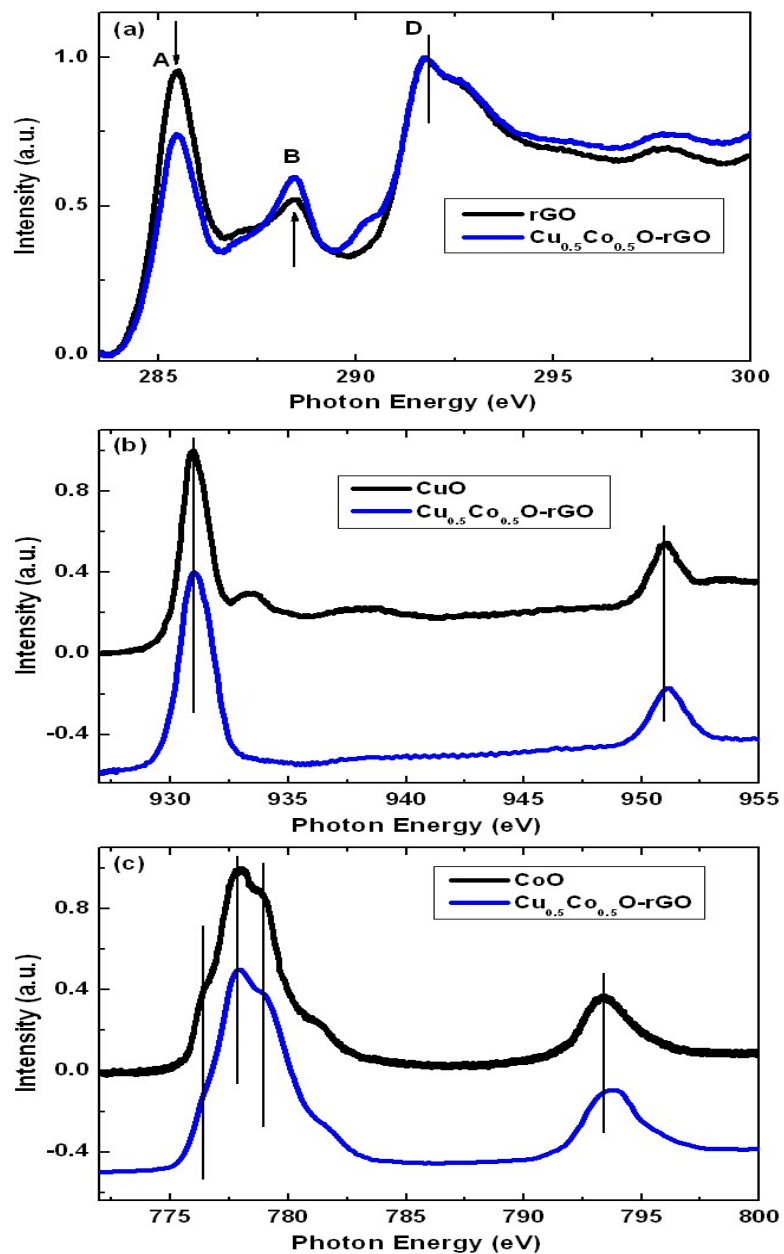

**Figure S7:** XAS spectra of Cu<sub>0.5</sub>Co<sub>0.5</sub>O-rGO and the reference samples at C *K*-edge (a); Cu *L*-edge (b); and Co *L*-edge (c).



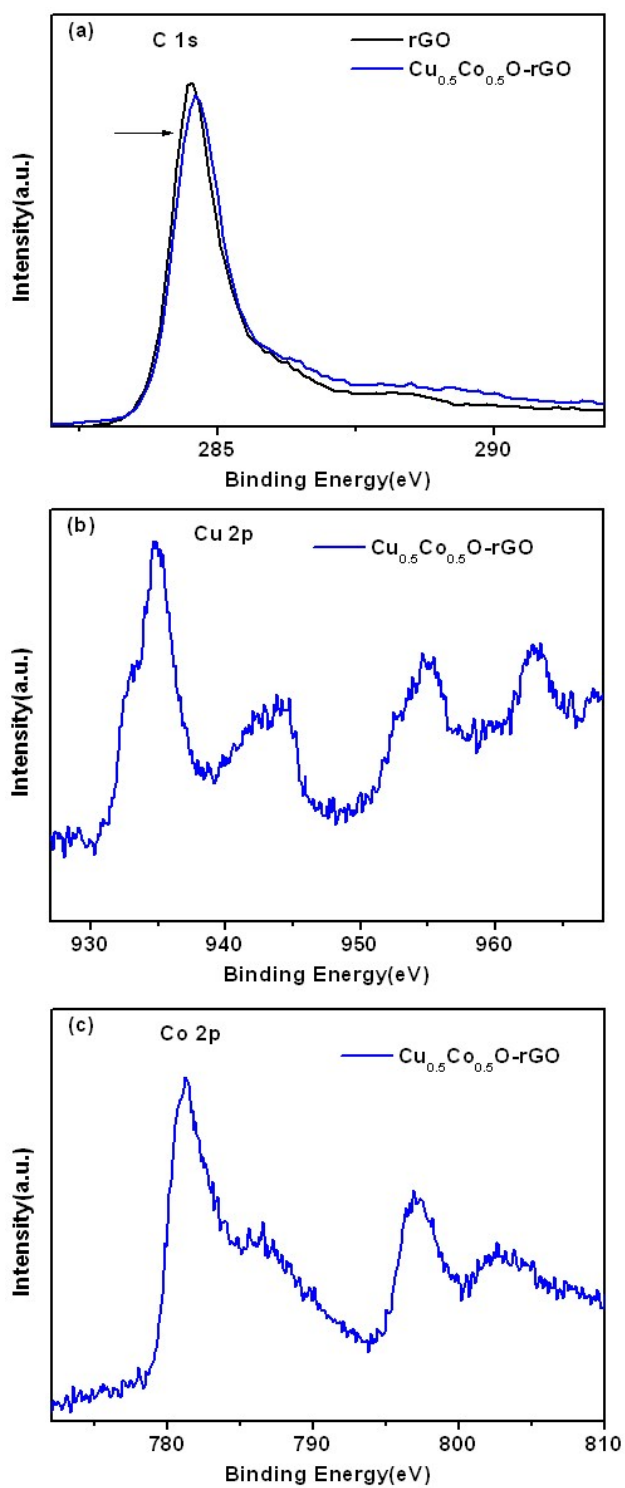

**Figure S8:** XPS spectra of  $\text{Cu}_{0.5}\text{Co}_{0.5}\text{O-rGO}$  at C 1s (a), Cu 2p (b) and Co 2p (c) edges, respectively.

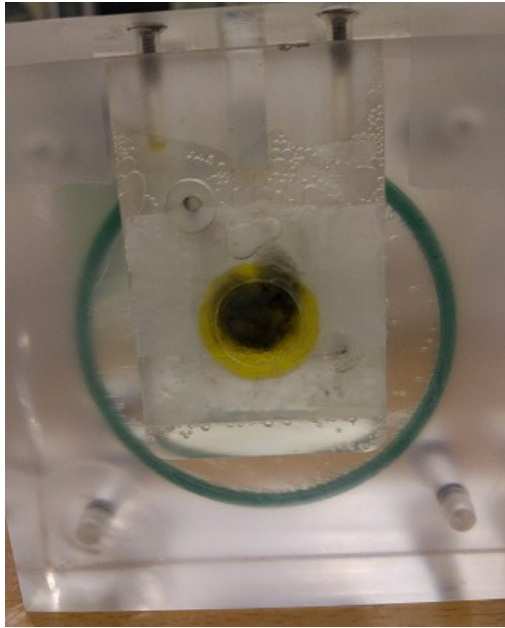

**Figure S9:** *In-situ* XAS cell with bubbles observed in the hydrolysis process.

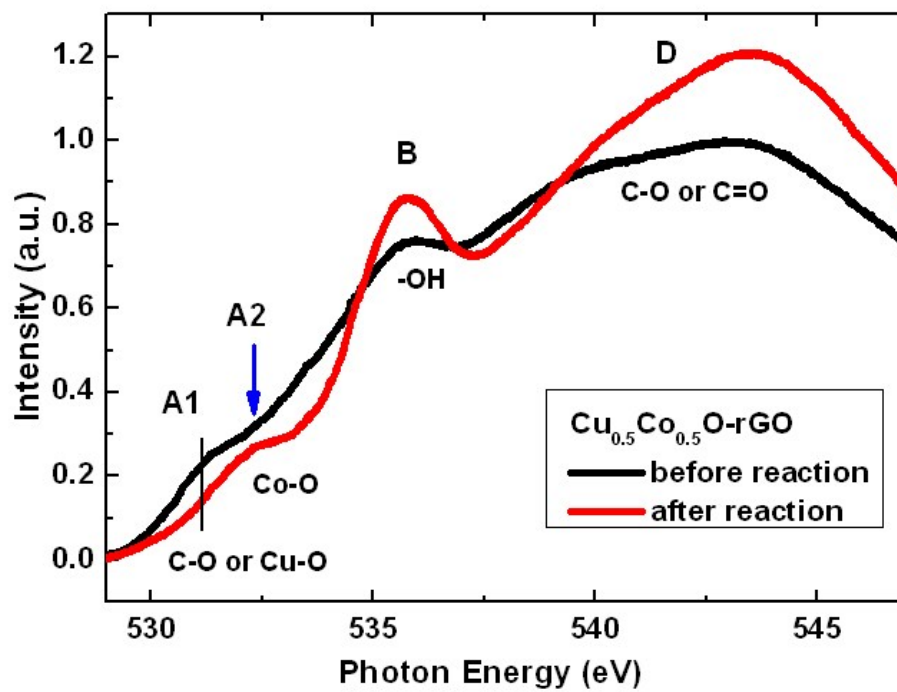

**Figure S10:** XAS spectra of Cu<sub>0.5</sub>Co<sub>0.5</sub>O-rGO before and after the reaction at O K-edge.

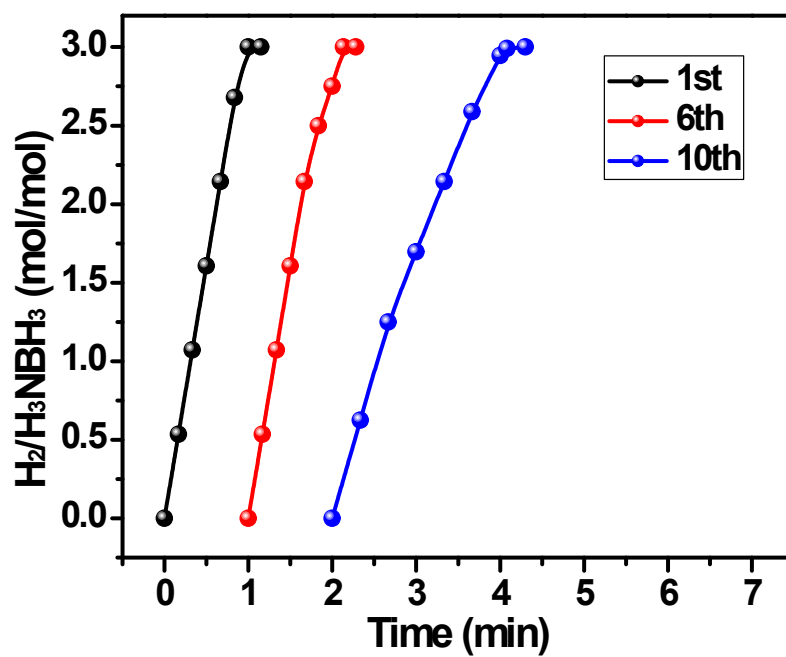

**Figure S11:** Stability test of Cu<sub>0.5</sub>Co<sub>0.5</sub>O-rGO after 9 runs. The TOF value slightly decreases from 81.7 to 72.1 in the 6<sup>th</sup> cycle (88.3% left), while sharply decreases to 43.5 in the 10<sup>th</sup> cycle (53.2% left).

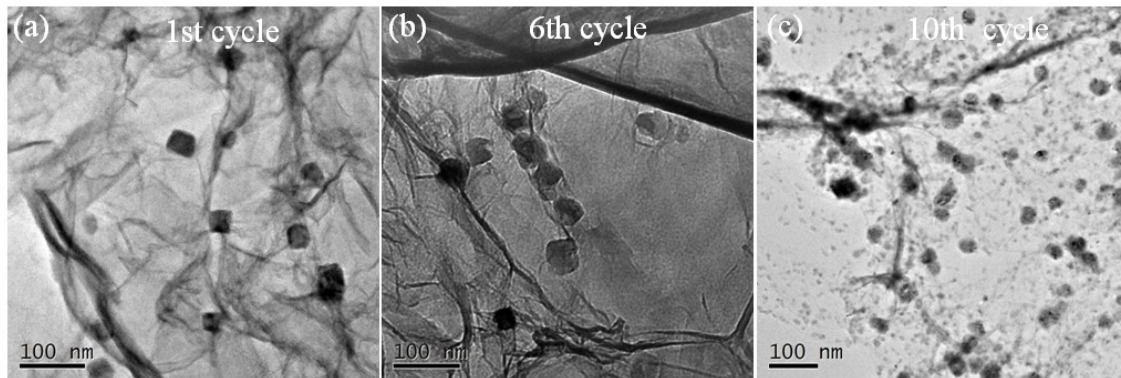

**Figure S12:** TEM images of the  $\text{Cu}_{0.5}\text{Co}_{0.5}\text{O}$ -rGO samples in the first cycle (a), the 6<sup>th</sup> cycle (b), and the 10<sup>th</sup> cycle (c).

| Samples                                      | Cu-loading/wt% | Co-loading/wt% | TOF (H <sub>2</sub> ) mol/(Cat-M)mol·min |
|----------------------------------------------|----------------|----------------|------------------------------------------|
| <b>Cu<sub>0.9</sub>Co<sub>0.1</sub>O-rGO</b> | <b>21.0</b>    | <b>1.8</b>     | <b>57.8</b>                              |
| <b>Cu<sub>0.7</sub>Co<sub>0.3</sub>O-rGO</b> | <b>16.1</b>    | <b>5.7</b>     | <b>59.6</b>                              |
| <b>Cu<sub>0.5</sub>Co<sub>0.5</sub>O-rGO</b> | <b>11.7</b>    | <b>10.0</b>    | <b>81.7</b>                              |
| <b>Cu<sub>0.3</sub>Co<sub>0.7</sub>O-rGO</b> | <b>7.2</b>     | <b>10.0</b>    | <b>64.4</b>                              |
| <b>Cu<sub>0.1</sub>Co<sub>0.9</sub>O-rGO</b> | <b>2.7</b>     | <b>14.3</b>    | <b>34.0</b>                              |
| <b>CuO-rGO</b>                               | <b>15.2</b>    | <b>-</b>       | <b>7.5</b>                               |
| <b>CoO-rGO</b>                               | <b>-</b>       | <b>13.2</b>    | <b>17.2</b>                              |
| <b>rGO</b>                                   | <b>-</b>       | <b>-</b>       | <b>0</b>                                 |

**Table S1.** Cu and Co contents and the TOF values of various Cu<sub>x</sub>Co<sub>1-x</sub>O-rGO samples.

| Catalyst                                                            | TOF (H <sub>2</sub> ) mol/(Cat-M)mol·min | Solution     | T (°C)    | Ref.             |
|---------------------------------------------------------------------|------------------------------------------|--------------|-----------|------------------|
| <b>Cu<sub>0.5</sub>Co<sub>0.5</sub>O-rGO cube</b>                   | <b>81.7</b>                              | <b>Water</b> | <b>25</b> | <b>This work</b> |
| <b>Ni<sub>0.3</sub>Co<sub>1.3</sub>P/GO</b>                         | <b>109.4</b>                             | <b>NaOH</b>  | <b>25</b> | <b>1</b>         |
| <b>Ni/ZIF-8</b>                                                     | <b>85.7</b>                              | <b>NaOH</b>  | <b>25</b> | <b>2</b>         |
| <b>CoP</b>                                                          | <b>72.2</b>                              | <b>NaOH</b>  | <b>25</b> | <b>3</b>         |
| <b>Cu<sub>0.8</sub>Co<sub>0.2</sub>O-GO</b>                         | <b>70.0</b>                              | <b>Water</b> | <b>25</b> | <b>4</b>         |
| <b>CuO-NiO</b>                                                      | <b>60.0</b>                              | <b>Water</b> | <b>25</b> | <b>5</b>         |
| <b>Cu<sub>0.5</sub>Ni<sub>0.5</sub>/CMK-1</b>                       | <b>54.8</b>                              | <b>Water</b> | <b>25</b> | <b>6</b>         |
| <b>CuCo/MIL-101-1-U</b>                                             | <b>51.7</b>                              | <b>Water</b> | <b>25</b> | <b>7</b>         |
| <b>Co NPs (in-situ)</b>                                             | <b>49.8</b>                              | <b>Water</b> | <b>25</b> | <b>8</b>         |
| <b>Ni NPs@3D-(N)GFs</b>                                             | <b>41.7</b>                              | <b>Water</b> | <b>25</b> | <b>9</b>         |
| <b>Ni<sub>2</sub>P</b>                                              | <b>40.4</b>                              | <b>Water</b> | <b>25</b> | <b>10</b>        |
| <b>Cu NPs@SCF</b>                                                   | <b>40.0</b>                              | <b>Water</b> | <b>25</b> | <b>11</b>        |
| <b>PEI-GO/Co</b>                                                    | <b>39.9</b>                              | <b>Water</b> | <b>25</b> | <b>12</b>        |
| <b>Ni@MCS-30</b>                                                    | <b>30.7</b>                              | <b>Water</b> | <b>25</b> | <b>13</b>        |
| <b>Cu<sub>0.49</sub>Co<sub>0.51</sub>/C</b>                         | <b>28.7</b>                              | <b>Water</b> | <b>25</b> | <b>14</b>        |
| <b>Ni/CNT</b>                                                       | <b>26.2</b>                              | <b>Water</b> | <b>25</b> | <b>15</b>        |
| <b>Ni NPs/CNT</b>                                                   | <b>23.5</b>                              | <b>Water</b> | <b>25</b> | <b>16</b>        |
| <b>Cu<sub>0.1</sub>@Co<sub>0.45</sub>Ni<sub>0.45</sub>/graphene</b> | <b>15.46</b>                             | <b>Water</b> | <b>25</b> | <b>17</b>        |
| <b>Ni NPs/C</b>                                                     | <b>8.8</b>                               | <b>Water</b> | <b>25</b> | <b>18</b>        |
| <b>Pt/C</b>                                                         | <b>111.0</b>                             | <b>Water</b> | <b>25</b> | <b>19</b>        |
| <b>Pt black</b>                                                     | <b>14.0</b>                              | <b>Water</b> | <b>25</b> | <b>19</b>        |

**Table S2.** TOF values reported in the literatures. The red color indicates the TOF values obtained in a NaOH solution instead of pure water.

References listed in Table S1:

1. C.C. Hou, Q. Li, C. J. Wang, C. Y. Peng, Q. Q. Chen, H. F. Ye, W. F. Fu, C. M. Che, N. López, Y. Chen, *Energy Environ. Sci.* **2017**, *10*, 1770-1776.
2. C. Wang, J. Tuninetti, Z. Wang, C. Zhang, R. Ciganda, L. Salmon, S. Moya, J. Ruiz, D. Astruc, *J. Am. Chem. Soc.* **2017**, *139*, 11610-11615.
3. Z. C. Fu, Y. Xu, S. L. Chan, W. W. Wang, F. Li, F. Liang, Y. Chen, Z. S. Lin, W. F. Fu, C. M. Che, *Chem. Commun.* **2017**, *53*, 705-708.
4. K. Feng, J. Zhong, B. Zhao, H. Zhang, L. Xu, X. Sun, S. T. Lee, *Angew. Chem. Int. Ed.* **2016**, *128*, 12129-12133.
5. H. Yen, F. Kleitz, *J. Mater. Chem. A* **2013**, *1*, 14790-14796.
6. H. Yen, Y. Seo, S. Kaliaguine, F. Kleitz, *ACS Catal.* **2015**, *5*, 5505-5511.
7. P. Liu, X. Gu, K. Kang, H. Zhang, J. Chen, H. Su, *ACS Appl. Mater. Interfaces* **2017**, *9*, 10759.
8. J. M. Yan, X. B. Zhang, H. Shioyama, Q. Xu, *J. Power Sources* **2010**, *195*, 1091-1094.
9. M. Mahyari, A. Shaabani, *J. Mater. Chem. A* **2014**, *2*, 16652-16659.
10. C. Y. Peng, L. Kang, S. Cao, Y. Chen, Z. S. Lin, W. F. Fu, *Angew. Chem. Int. Ed.* **2015**, *54*, 15725-15729.
11. M. Kaya, M. Zahmakiran, S. Özkar, M. Volkan, *ACS Appl. Mater. Interfaces* **2012**, *4*, 3866-3873.
12. J. T. Hu, Z. X. Chen, M. X. Li, X. H. Zhou, H. B. Lu, *ACS Appl. Mater. Interfaces* **2014**, *6*, 13191-13200.
13. P. Z. Li, A. Aijaz, Q. Xu, *Angew. Chem. Int. Ed.* **2012**, *51*, 6753-6756.
14. A. Bulut, M. Yurderi, I. E. Ertas, M. Celebi, M. Kaya, M. Zahmakiran, *Appl Catal B-Environ* **2016**, *180*, 121-129.
15. J. K. Zhang, C. Q. Chen, W. J. Yan, F. F. Duan, B. Zhang, Z. Gao, Y. Qin, *Catal. Sci. Technol.* **2016**, *6*, 2112-2119.
16. G. Q. Zhao, J. Zhong, J. Wang, T. K. Sham, X. H. Sun, S. T. Lee, *Nanoscale* **2015**, *7*, 9715-9722.
17. X. Y. Meng, L. Yang, N. Cao, C. Du, K. Hu, J. Su, W. Luo, G. Z. Cheng, *ChemPlusChem* **2014**, *79*, 325-332.
18. Ö. Metin, V. Mazumder, S. Özkar, S. H. Sun, *J. Am. Chem. Soc.* **2010**, *132*, 1468-1469.



19. Q. Xu, M. Chandra, *J. Alloy Compd.* **2007**, 446-447, 729-732.

| Cycles          | TOF (H <sub>2</sub> ) mol/(Cat-M)mol·min | Catalytic Efficiency |
|-----------------|------------------------------------------|----------------------|
| 1 <sup>st</sup> | 81.7                                     | 100%                 |
| 2 <sup>nd</sup> | 76.6                                     | 93.8%                |
| 3 <sup>rd</sup> | 76.6                                     | 93.8%                |
| 4 <sup>th</sup> | 73.2                                     | 89.6%                |
| 5 <sup>th</sup> | 72.1                                     | 88.3%                |
| 6 <sup>th</sup> | 72.1                                     | 88.3%                |

**Table S3.** TOF values and the catalytic efficiencies of Cu<sub>0.5</sub>Co<sub>0.5</sub>O-rGO in different cycles during the stability test.
